# Supplementary material
Source: PubMed Central journal article supplement (PMC3406137)
Supplement: AEM.01084-12_zam999103499so2.pdf [file AEM.01084-12_zam999103499so2.pdf]

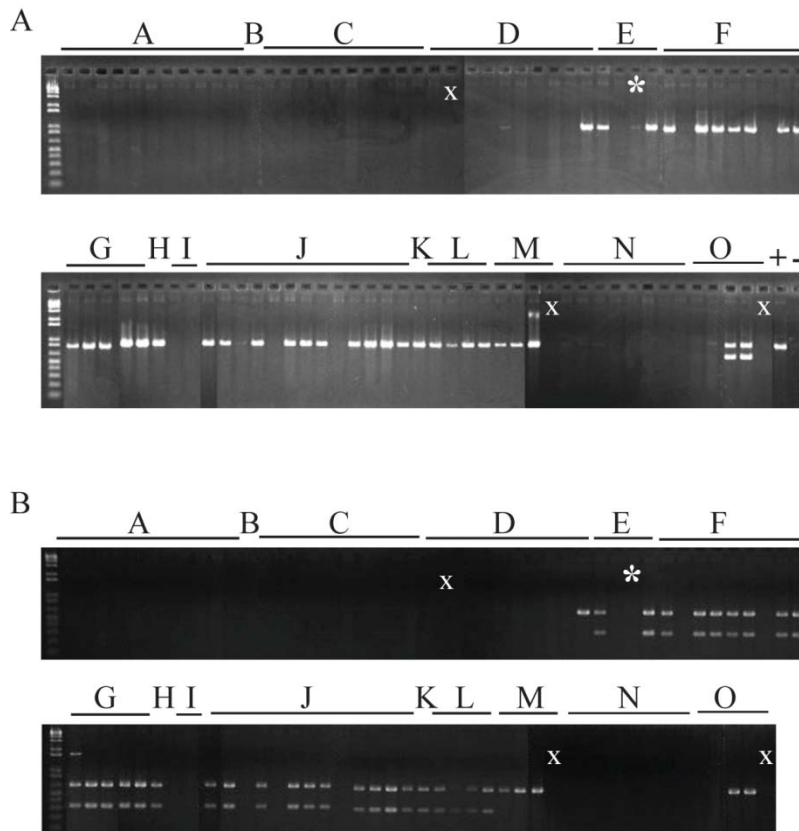

Fig. S1: Amplification of endophyte DNA from seed of Greek tall fescue lines. Total DNA extracted from 3 seeds of each tall fescue line was amplified using endophyte-specific primers designed to A) *tefA* and B) *perA-A2*. Amplicon detection indicates the presence of fungal biomass within the seeds. Tall fescue lines are provided in numerical order. The letters above indicate the collection locations marked in Fig. 1. The asterisk (\*) denotes accession 45081, which had a low incidence of endophyte infection. Tall fescue lines with no seed available are represented by an X. + = positive control, - = negative control.

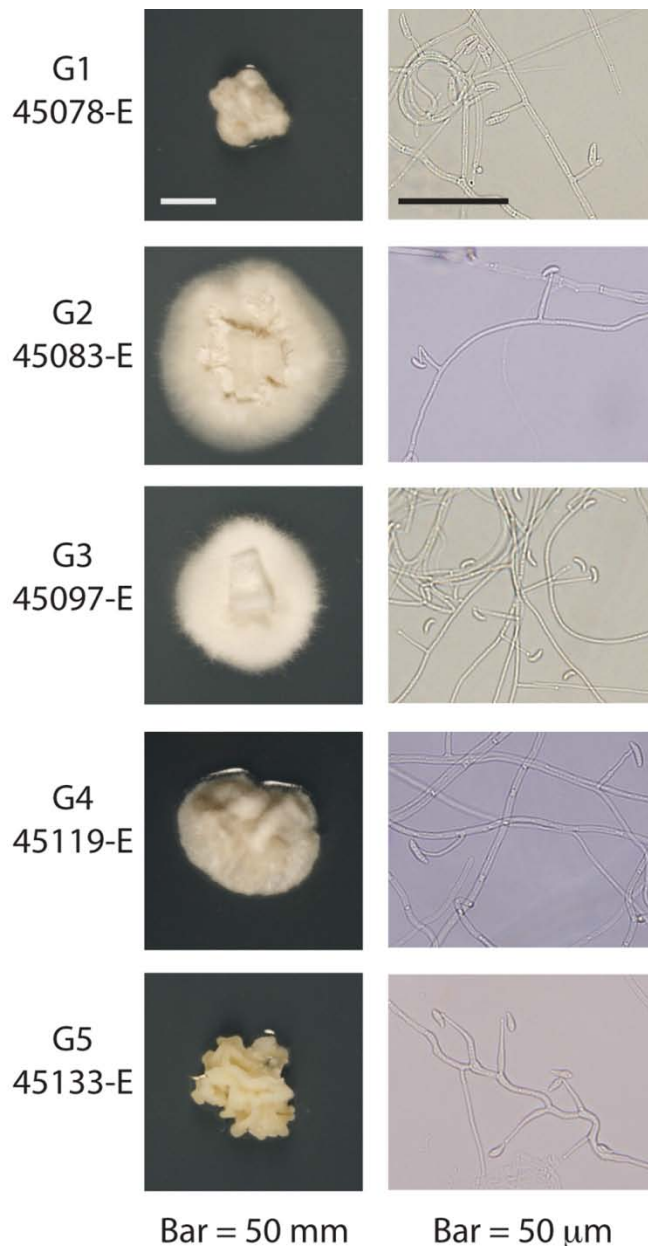

Fig. S2: Colony and conidia morphology of Greek isolates representative of the five unique morphotypes/genotypes G1-G5. Colony morphology was photographed after 21 days of growth at 22°C. Isolate designations are listed in the figure. Bar = 50 mm and 50 μm for colony and conidial photographs, respectively.

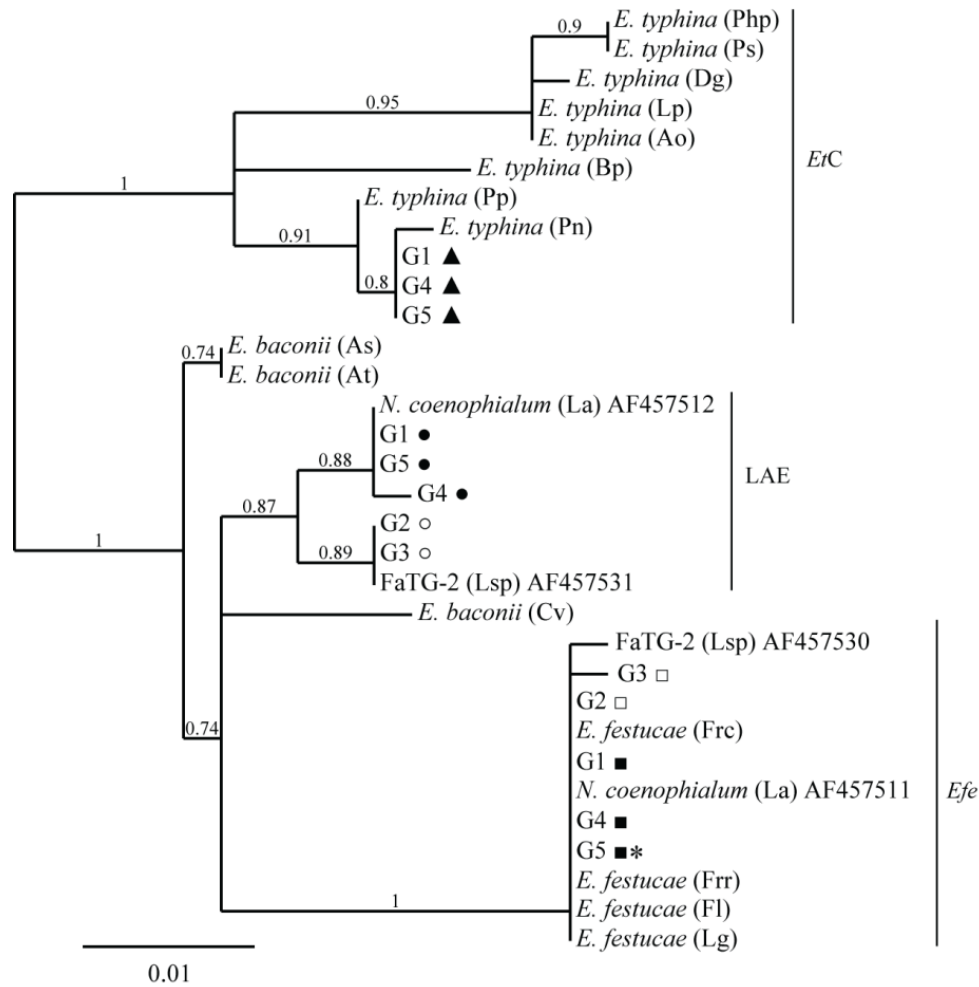

Fig. S3: Phylogeny derived from maximum likelihood (ML) analysis of introns 1-4 of *tefA* from representative haploid *Epichloë* species, hybrid *Neotyphodium* species, and copies obtained from the Greek tall fescue endophytes. Midpoint root is at the left edge. Numbers at branches are the branch support values; branches with less than 50% support were collapsed. Letters in parentheses after the *Epichloë* and *Neotyphodium* isolates refer to host designations as follows: Ao (*Anthoxanthum odoratum*); As (*Agrostis stolonifera*); At (*Agrostis tenuis*); Bp (*Brachypodium pinnatum*); Cv (*Calamagrostis villosa*); Fl (*Festuca longifolia*); Frc (*Festuca rubra* subsp. *commutata*); Frr (*Festuca rubra* subsp. *rubra*); La (*Lolium arundinaceum* = *Schedonorus phoenix*); Lp (*Lolium perenne* subsp. *perenne*); Lsp (*Lolium* sp.); Php (*Phleum pratense*); Pn (*Poa nemoralis*); Pp (*Poa pratensis*); Ps (*Poa silvicola*). Multiple alleles from *N.*

*coenophialum* and FaTG-2 isolates are designated by Genbank accession number, and G1, G4, and G5 copies are designated by ▲ (copy 1), ■ (copy 2), or ● (copy 3); alleles from G2 and G3 isolates are designated by □ (copy 1) or ○ (copy 2). The *tefA* allele of the G5 isolates containing a deletion is designated with an asterisk. *EtC*, *Epichloë typhina* complex; *Efe*, *E. festucae*; LAE, *Lolium*-associated endophyte clade.

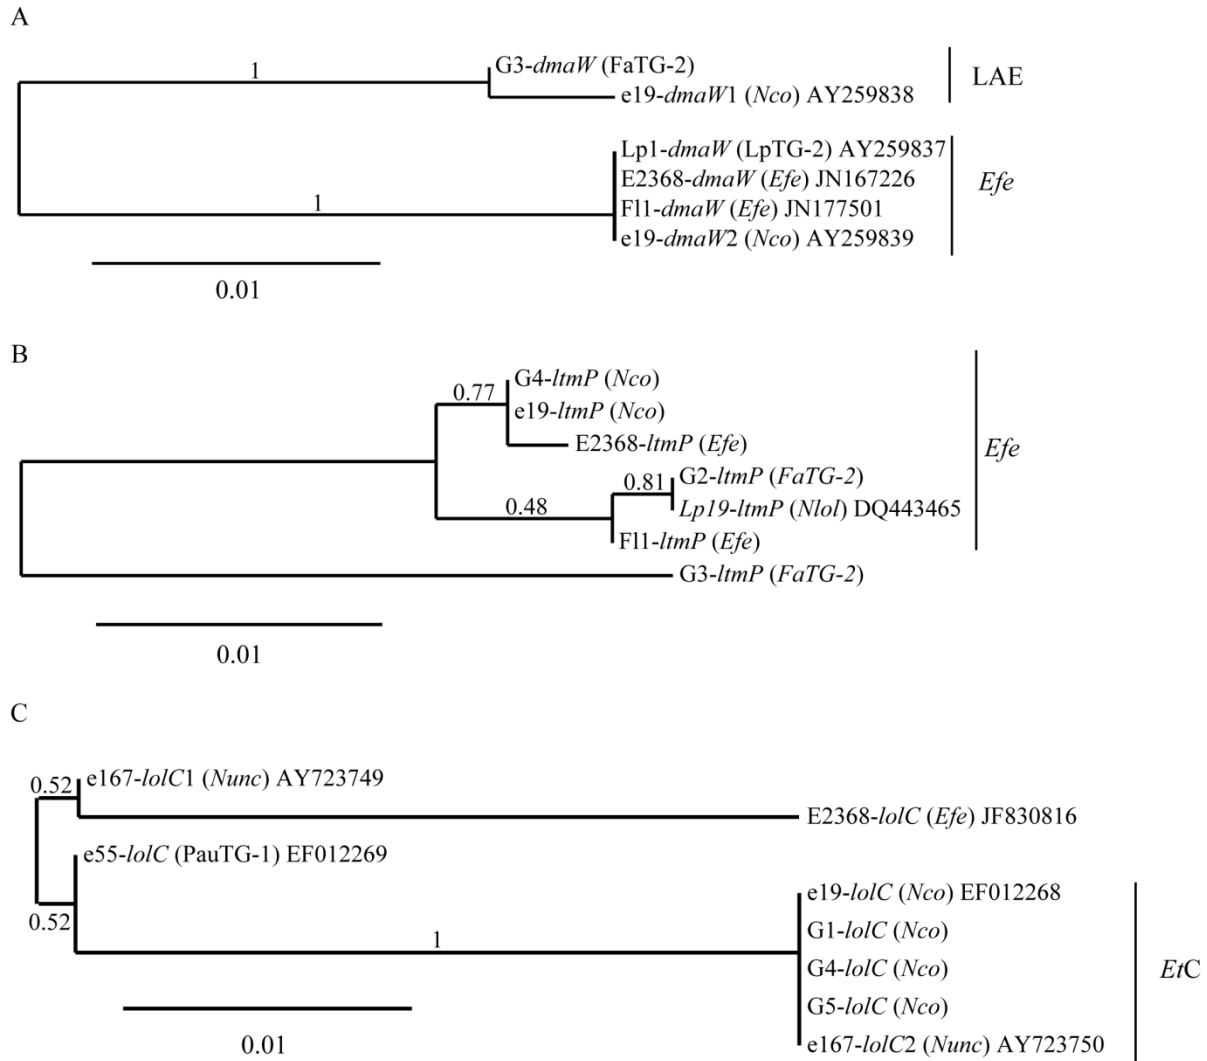

Figure S4: Phylogeny derived from maximum likelihood (ML) analysis of sequence fragments of (A) *dmaW*, (B) *ltmP*, and (C) *lolC* from *E. festucae* and *Neotyphodium* sp. Accession numbers for previously published *dmaW* gene sequences are listed to the right of isolates in the figure. Midpoint root is at the left edge. Numbers at branches are the branch support values; branches with less than 50% support were collapsed. *EtC*, *Epichloë typhina* complex; *Efe*, *E. festucae*; LAE, *Lolium*-associated endophyte clade.

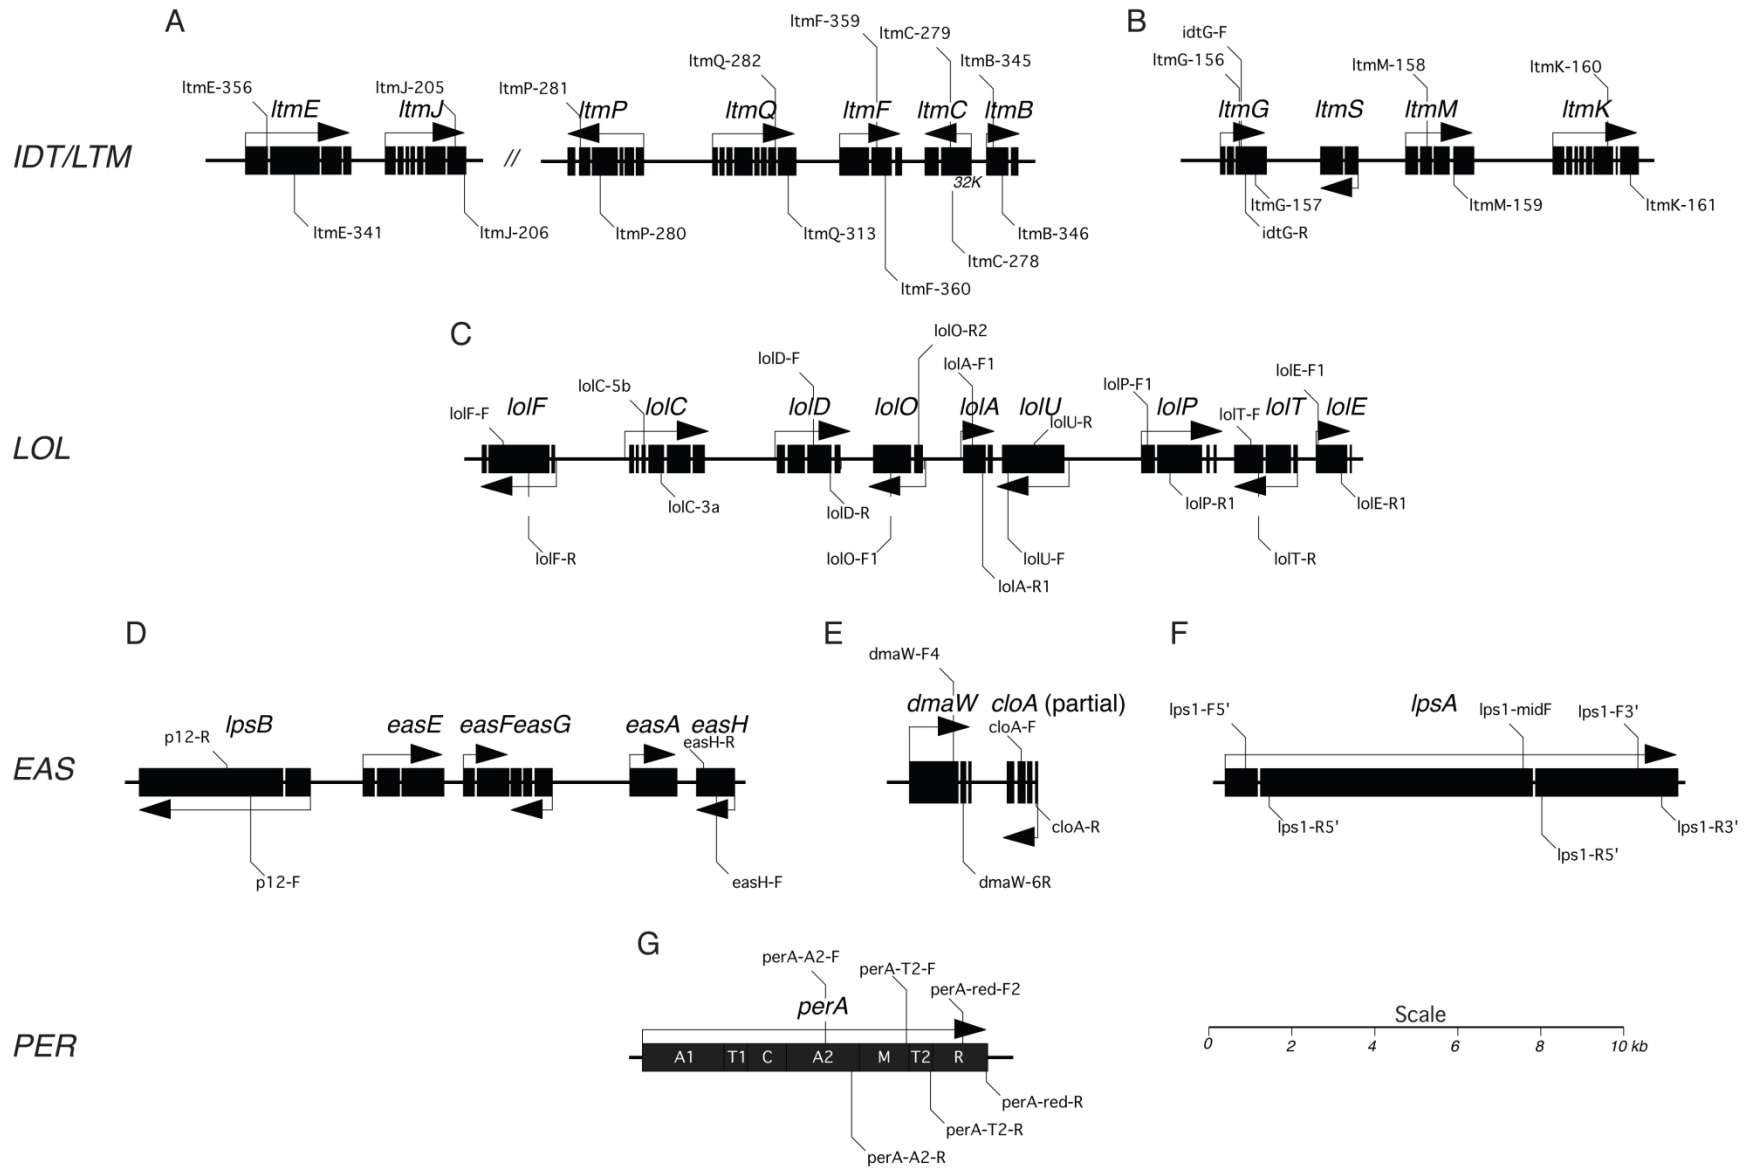

Figure S5: Alkaloid biosynthesis gene clusters and primer locations for the alkaloid genes referenced within this study. A and B: Indole-diterpene (*IDT/LTM*) locus from *N. lolii*, DQ443465 and AY742903, respectively. C: Loline locus *LOL1* of *N. uncinatum*, AY723749. D, E, and F: Ergot alkaloid (*EAS*) loci from *N. lolii* (D, EF125025), *N. coenophialum* (E, AY259839), and *N. sp.* LpTG-2 (F, AF368420). G: Peramine (*PER*) locus from *E. festucae* (AB205145).

Table S1: Primers used in this study

| Gene                     | Forward       | Primer sequence (5'→3')     | Reverse       | Primer sequence (5'→3')     |
|--------------------------|---------------|-----------------------------|---------------|-----------------------------|
| <i>tefA</i> <sup>a</sup> | Tef1-exon1d-1 | GGGTAAGGACGAAAAGACTCA       | Tef1-exon6u-1 | CGGCAGCGATAATCAGGATAG       |
| <i>tubB</i> <sup>b</sup> | T1.1          | GAGAAAATGCGTGAGATTGT        | T1.2          | CTGGTCAACCAGCTCAGCAC        |
| <i>matA</i> <sup>c</sup> | mtAC-F2       | GAGAACTGAGGAAAGACCACTCAG    | mtAC-R        | CGGTCTCATTCTTCCAGAGAGAGG    |
| <i>matB</i> <sup>c</sup> | mtBA-F        | TCTACCGCAAGGAACGACACAATACCG | mtBA-R        | GCTTTTCCAGCAAGGCTTGCTTGACTC |
| <i>ltmG</i> <sup>d</sup> | ltmG-156      | GCACAAACAATAAATTCGGCCAA     | ltmG-157      | AATTTGCCCTCTGTAAATCCTC      |
| <i>ltmG</i>              | idtG-F        | GAGCTTGAGAAGCTTACGAATCC     | idtG-R        | GGGCAATGGAGCGATTCTCTC       |
| <i>ltmM</i> <sup>d</sup> | ltmM-158      | GTGATCGGTGCTGACGGGTCCA      | ltmM-159      | TATCGCCATATTTGCTCCTTGCCC    |
| <i>ltmK</i> <sup>d</sup> | ltmK-160      | ATATTGAATTGCTGCGTGAGGAG     | ltmK-161      | AGAGGCCAAGAAGCGGCCTGGACA    |
| <i>ltmB</i> <sup>d</sup> | ltmB-345      | AACATCGCCTGGGAGCTCGTATA     | ltmB-346      | CGCAGGTCCTATTTCCATCGC       |
| <i>ltmC</i> <sup>d</sup> | ltmC-278      | GAAACTGCCAATCGAGCATA        | ltmC-279      | TTCTTGCAATCATTTTGCAATTG     |
| <i>ltmF</i> <sup>d</sup> | ltmF-359      | GAATTATGTTACTCTTGGGG        | ltmF-360      | AAGTTGGCACATAGGTCTTC        |
| <i>ltmQ</i> <sup>d</sup> | ltmQ-313      | CTACCAGGACAGGCGTGACGTCC     | ltmQ-282      | CAGAGGTTTAAACCCTCTTGACGC    |
| <i>ltmP</i> <sup>d</sup> | ltmP-280      | ATGGCTGTCATTCATACAACAGCTATG | ltmP-281      | AGCGTCCCGGACAGGCATATCTCCCA  |
| <i>ltmP</i>              | ltmP-F1       | ACATGGATCTGATTGTCATTCC      | ltmP-R1       | TACGATGCGCAAGTGCTTCTGG      |
| <i>ltmJ</i> <sup>d</sup> | ltmJ-205      | CCAAGCATCGATTTGTCACC        | ltmJ-206      | AATCTGATCGCCATCTTTGC        |
| <i>ltmE</i> <sup>d</sup> | ltmE-356      | CCGAGTTTGATGACCTGCTG        | ltmE-341      | TTCCGCTTCCGAGTAGACTC        |
| <i>lolC</i> <sup>e</sup> | lolC-3a       | GGTCTAGTATTACGTTGCCAGGG     | lolC-5b       | TCTAAACTTGACGCAGTTCGGC      |
| <i>lolA</i>              | lolA-F1       | GAGACACTAGAGAAATGGCAGCTGC   | lolA-R1       | GGCATCCATGGTGGCGAAGATGTG    |
| <i>lolF</i>              | lolF-F        | CTCTGATATGAAGACTCCTGAGC     | lolF-R        | GCCAAGCGGAGTTCAGATCATCC     |
| <i>lolD</i>              | lolD-F        | CTCGACGTTTCAACAGATTGCAG     | lolD-R        | GTCTTTGAAGACAAGCCAGTCC      |
| <i>lolU</i>              | lolU-F        | CGATGGTTGGATCAGTCGTTGC      | lolU-R        | GAGCTGATGCGGCATTGGCATC      |
| <i>lolT</i>              | lolT-F        | CACTGACCTCCAAGTATACTTGC     | lolT-R        | CGTCATCCCGACCTCTTTCCGGAT    |



|                            |             |                           |            |                           |
|----------------------------|-------------|---------------------------|------------|---------------------------|
| <i>lolE</i>                | lolE-F1     | ACCAAGCCAACGGATATCTTCGC   | lolE-R1    | ACGTCTTTGGTCCGTCTTGTTAG   |
| <i>lolP</i>                | lolP-F1     | GTTCTAAACATCGTGACTIONGGGC | lolP-R1    | GGTAGGTCAGCATCTTGTCAACG   |
| <i>lolO</i>                | lolO-F1     | GTGAACCTGGCAGTAGTCCGTATG  | lolO-R2    | AATCCATGCCAGTGTCCGGGAATG  |
| <i>perA</i>                | perA A2-F   | CGTCGTGGTAACGCACGCAAACG   | perA A2-R  | CAGTCTGCCTTGCCGACCGGGGT   |
| <i>perA</i>                | perA T2-F   | TCTTCAGGCATCGCAGGAAC      | perA T2-R  | TCGGCCACCTCCAGCCTGATG     |
| <i>perA</i>                | perA red-F2 | GAGATCAGTTCGCAGTTGTGTCAG  | perA red-R | CTAGCCTCCAGATCTTGTGAAAG   |
| <i>dmaW</i>                | dmaW-F4     | GTGTACTTTACTGTGTTCCGGCATG | dmaW-6R    | GTGGAGATACACACTTAAATATGGC |
| <i>cloA</i>                | cloA-F      | GGATGAACTTGTGAGGTGACGAG   | cloA-R     | GTGATCAGGGATACCTTTGATTAC  |
| <i>easH</i>                | easH-F      | AGATATGGCATCGTGACCAGCC    | easH-R     | GGCATGTAGCATCAAATGGTGTC   |
| <i>lpsA</i>                | lps1-F5'    | ATGTCCGTGGATGGTGAGCAAAC   | lps1-R5'   | ATGCAATGGGTGCCTGTCCGTTC   |
| <i>lpsA</i>                | lps1-midF   | CGCTGCTCTCTGTGATGCAGAAG   | lps1-midR  | GTTCCCTCATCCAACATCTCGATC  |
| <i>lpsA</i>                | lps1-F3'    | CGATCACCCAACTTTACATGATAC  | lps1-R3'   | ACAAGTCATGGTCCGGATGTGTTG  |
| <i>lpsB<sup>f, g</sup></i> | p12-R       | TACCCACTGCCTCGAACTTG      | p12-F      | CCGTCTTCCCCTATACCGAA      |
| SSR <sup>h</sup>           | B10.1       | CGCTCAGGGCTACATACACCATGG  | B10.2      | CTCATCGAGTAACGCAGGGCGACG  |
| SSR <sup>h</sup>           | B11.1       | CATGGATGGACAAGAGATTGCACG  | B11.2      | TTCCTGCTACAATTCTGTCCAGC   |
| SSR <sup>i</sup>           | A1AG12-F    | CCCCGACAATCTAGCATACTTCG   | A1AG12-R   | CGGTGATGATGACAAGCCTTGGAC  |

<sup>a</sup>Craven KD, Hsiau PTW, Leuchtmann A, Hollin W, Schardl CL. 2001. Multigene phylogeny of *Epichloë* species, fungal symbionts of grasses. *Ann. Mo. Bot. Gard.* **88**:14-34.

<sup>b</sup>Young CA, Bryant MK, Christensen MJ, Tapper BA, Bryan GT, Scott B. 2005. Molecular cloning and genetic analysis of a symbiosis-expressed gene cluster for lolitrem biosynthesis from a mutualistic endophyte of perennial ryegrass. *Mol. Gen. Genomics* **274**:13–29.

<sup>c</sup>Primers designed from the following accession numbers HQ680587 (*mtAC*) and HQ680590 (*mtBA*)

- <sup>d</sup>Young, CA, Tapper BA, May K, Moon CD, Schardl CL, Scott B. 2009. Indole-diterpene biosynthetic capability of *Epichloë* endophytes as predicted by *ltm* gene analysis. *Appl. Environ. Microbiol.* **75**:2200–2211.
- <sup>e</sup>Spiering MJ, Wilkinson HH, Blankenship JD, Schardl CL. 2002. Expressed sequence tags and genes associated with loline alkaloid expression by the fungal endophyte *Neotyphodium uncinatum*. *Fungal Genet. Biol.* **36**:242–254.
- <sup>f</sup>Tanaka A, Tapper BA, Popay A, Parker EJ, Scott B. 2005. A symbiosis expressed non-ribosomal peptide synthetase from a mutualistic fungal endophyte of perennial ryegrass confers protection to the symbiotum from insect herbivory. *Mol. Microbiol.* **57**:1036–1050.
- <sup>g</sup>Johnson R, Voisey C, Johnson L, Pratt J, Fleetwood D, Khan A, Bryan G. 2007. Distribution of NRPS gene families within the *Neotyphodium/Epichloë* complex. *Fungal Genet Biol* **44**:1180–1190.
- <sup>h</sup>Moon CD, Tapper BA, Scott B. 1999. Identification of *Epichloë* endophytes in planta by a microsatellite-based PCR fingerprinting assay with automated analysis. *Appl. Environ. Microbiol.* **65**:1268-1279.
- <sup>i</sup>van Zijll de Jong E, Guthridge KM, Spangenberg GC, Forster JW. 2003. Development and characterization of EST-derived simple sequence repeat (SSR) markers for pasture grass endophytes. *Genome.* **46**:277-290.

Table S2: Genbank accessions of *tefA* and *tubB* sequences from *Epichloë* and *Neotyphodium* species used for phylogenetic analyses in this study

| Endophyte                         | Isolate           | GenBank Accession number |             |
|-----------------------------------|-------------------|--------------------------|-------------|
|                                   |                   | <i>tubB</i>              | <i>tefA</i> |
| <i>Neotyphodium coenophialum</i>  | Greek-type 1 (G1) | JX028244                 | JX028257    |
|                                   |                   | JX028245                 | JX028258    |
|                                   |                   | JX028246                 | JX028259    |
| <i>N. coenophialum</i>            | (G4)              | JX028247                 | JX028260    |
|                                   |                   | JX028248                 | JX028261    |
|                                   |                   | JX028249                 | JX028262    |
| <i>N. coenophialum</i>            | (G5)              | JX028250                 | JX028263    |
|                                   |                   | JX028251                 | JX028264    |
|                                   |                   | JX028252                 | JX028265    |
| FaTG-2 ( <i>Neotyphodium</i> sp.) | (G2)              | JX028253                 | JX028266    |
|                                   |                   | JX028254                 | JX028267    |
| FaTG-2 ( <i>Neotyphodium</i> sp.) | (G3)              | JX028255                 | JX028268    |
|                                   |                   | JX028256                 | JX028269    |
|                                   |                   | AF457466                 | AF457505    |
| <i>Epichloë amarillans</i>        | E273              | AF457466                 | AF457505    |
| <i>E. baconii</i>                 | ATCC 76552        | L06961                   | AF231193    |
| <i>E. baconii</i>                 | ATCC 90167        | L78279                   | AF231194    |
| <i>E. baconii</i>                 | ATCC 200745       | L78270                   | AF231196    |
| <i>E. festucae</i>                | ATCC 90660        | AF250746                 | AF231214    |
| <i>E. festucae</i>                | ATCC 90661        | L06955                   | AF231210    |
| <i>E. festucae</i>                | E28               | L06956                   | AF231213    |
| <i>E. festucae</i>                | E434              | L78286                   | AF231212    |
| <i>E. typhina</i>                 | ATCC 200738       | L78288                   | AF231222    |
| <i>E. typhina</i>                 | ATCC 200739       | L78292                   | AF231223    |
| <i>E. typhina</i>                 | ATCC 200740       | L78274                   | AF231225    |
| <i>E. typhina</i>                 | ATCC 200736       | X52616                   | AF231220    |
| <i>E. typhina</i>                 | ATCC 200851       | L78280                   | AF231226    |
| <i>E. typhina</i>                 | ATCC 201667       | AF062429                 | AF231229    |
| <i>E. typhina</i>                 | ATCC 201669       | L78284                   | AF231231    |
| <i>E. typhina</i>                 | ATCC 201666       | L78285                   | AF231228    |
| <i>N. coenophialum</i>            | ATCC 90664        | L06964                   | AF457511    |
|                                   |                   | L06951                   | AF457512    |
|                                   |                   | X56847                   | —           |
| FaTG-2 ( <i>Neotyphodium</i> sp.) | 4078=Tf14         | L06963                   | AF457531    |
|                                   |                   | L06952                   | AF457532    |
